# Supplementary material for: Dual-modal fluorescent/magnetic bioprobes based on small sized upconversion nanoparticles of amine-functionalized BaGdF5:Yb/Er
Source: Royal Society of Chemistry journal article supplement (doi:10.1039/c2nr31294h), 2012-01-01
Supplement: c2nr31294h.pdf [file c2nr31294h.pdf]

## Supporting Information

# Dual-modal Fluorescent/Magnetic Bioprobes Based on Small Sized Upconversion Nanoparticles of Amine-functionalized BaGdF<sub>5</sub>:Yb/Er

*Songjun Zeng,<sup>ab</sup> Ming-Kiu Tsang,<sup>a</sup> Chi-Fai Chan,<sup>ac</sup> Ka-Leung Wong,<sup>c</sup> and Jianhua Hao<sup>\*a</sup>*

<sup>a</sup> Department of Applied Physics and Materials Research Center, The Hong Kong Polytechnic University,

Hong Kong. E-mail: [apjhao@polyu.edu.hk](mailto:apjhao@polyu.edu.hk)

<sup>b</sup> Faculty of Materials, Optoelectronics and Physics, Key Laboratory of Low-dimensional Materials and Application Technology (Ministry of Education), Xiangtan University, Xiangtan 411105, People's Republic of China.

<sup>c</sup> Department of Chemistry, Hong Kong Baptist University, Hong Kong.

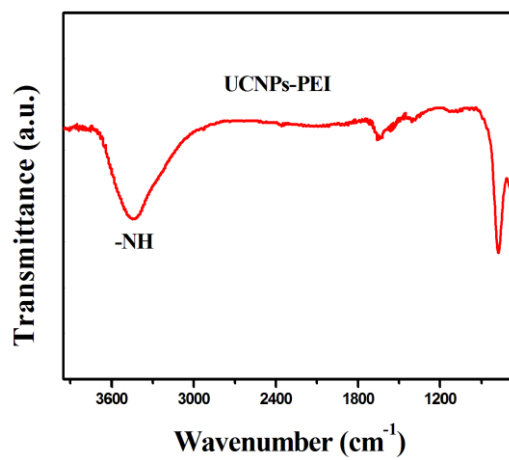

**Figure S1.** FTIR spectra of the amine-functionalized BaGdF<sub>5</sub>:Yb/Er NPs .

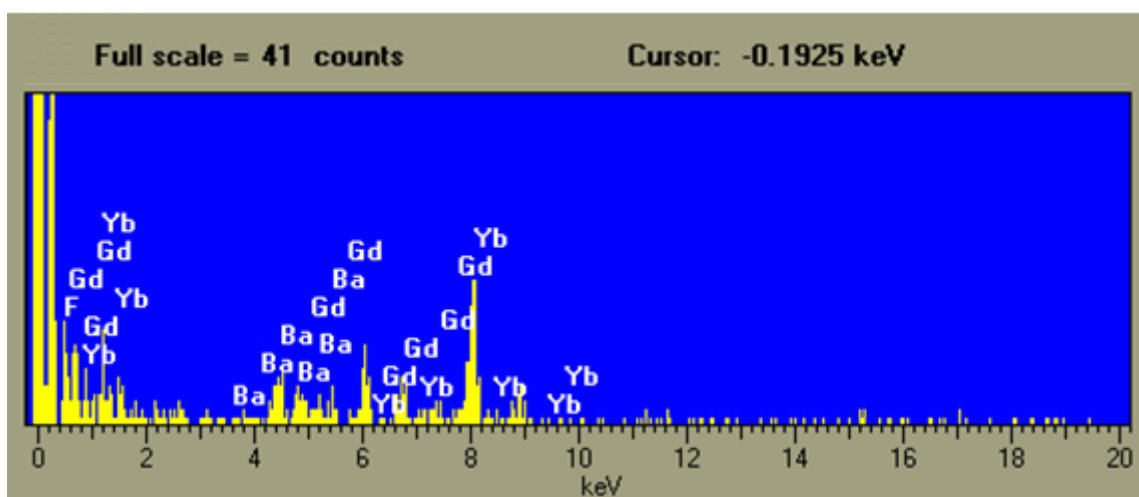

**Figure S2.** EDS spectra of the amine-functionalized BaGdF<sub>5</sub>:Yb/Er NPs (UCNPs-PEI).

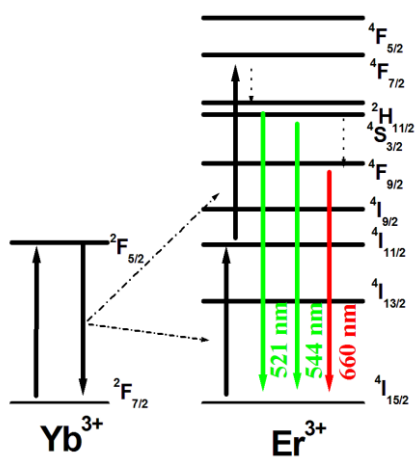

**Figure S3.** The simplified energy-level diagrams of  $\text{Yb}^{3+}/\text{Er}^{3+}$  and the corresponding mechanism of upconversion emissions.
